# Supplementary material
Source: ML conference proceedings conference paper supplement (https://openaccess.thecvf.com/content/CVPR2026/html/Tapli_Rethinking_Concept_Bottleneck_CVPR_2026_paper.html)
Supplement: Supplementary file 1 [file Tapli_Rethinking_Concept_Bottleneck_CVPR_2026_supplemental.pdf]

# Rethinking Concept Bottleneck Models: From Pitfalls to Solutions

## Supplementary Material

### A. Supplementary

#### A.1. ImageNet100 Class List

Table 4. List of 100 ImageNet classes used in ImageNet100.

|           |           |           |           |
|-----------|-----------|-----------|-----------|
| n02869837 | n01749939 | n02488291 | n02107142 |
| n13037406 | n02091831 | n04517823 | n04589890 |
| n03062245 | n01773797 | n01735189 | n07831146 |
| n07753275 | n03085013 | n04485082 | n02105505 |
| n01983481 | n02788148 | n03530642 | n04435653 |
| n02086910 | n02859443 | n13040303 | n03594734 |
| n02085620 | n02099849 | n01558993 | n04493381 |
| n02109047 | n04111531 | n02877765 | n04429376 |
| n02009229 | n01978455 | n02106550 | n01820546 |
| n01692333 | n07714571 | n02974003 | n02114855 |
| n03785016 | n03764736 | n03775546 | n02087046 |
| n07836838 | n04099969 | n04592741 | n03891251 |
| n02701002 | n03379051 | n02259212 | n07715103 |
| n03947888 | n04026417 | n02326432 | n03637318 |
| n01980166 | n02113799 | n02086240 | n03903868 |
| n02483362 | n04127249 | n02089973 | n03017168 |
| n02093428 | n02804414 | n02396427 | n04418357 |
| n02172182 | n01729322 | n02113978 | n03787032 |
| n02089867 | n02119022 | n03777754 | n04238763 |
| n02231487 | n03032252 | n02138441 | n02104029 |
| n03837869 | n03494278 | n04136333 | n03794056 |
| n03492542 | n02018207 | n04067472 | n03930630 |
| n03584829 | n02123045 | n04229816 | n02100583 |
| n03642806 | n04336792 | n03259280 | n02116738 |
| n02108089 | n03424325 | n01855672 | n02090622 |

#### A.2. Additional Experimental Setup Details

In [Tab. 5](#), we report the learning rates ( $\eta$ ) used for optimizing the concept encoder and classifier, along with the distillation temperature and the  $\alpha/\beta$  weights for balancing the classifier loss terms. The table also indicates whether a learning rate scheduler is used. When needed, we employ a cosine annealing schedule with a minimum learning rate of 0.0001 and a cycle length of 20 epochs. Hyperparameters are provided per dataset, and the same settings are used across different vision backbones and VLMs.

The Non-linear CBM in [Fig. 5](#) and the Distilled CBM in [Fig. 6](#) correspond to the same underlying model. For the Linear CBM and Vanilla CBM ablation experiments, we use the same hyperparameters for consistency.

#### A.3. Irrelevant and Random Words Concept Sets

We provide the randomly selected concepts from our irrelevant and random words concept sets in [Tab. 6](#). These

Table 5. Hyperparameter settings for each dataset, including learning rates ( $\eta$ ) and scheduler usage for the concept encoder and classifier, along with the  $\alpha$  and  $\beta$  loss weights and distillation temperature. Identical settings are used across all vision backbones and VLMs.

| Dataset     | Concept Encoder |           |          | Classifier |             |        |           |
|-------------|-----------------|-----------|----------|------------|-------------|--------|-----------|
|             | $\eta$          | Scheduler | $\alpha$ | $\beta$    | Temperature | $\eta$ | Scheduler |
| ImageNet100 | 0.001           | ✓         | 1        | 1          | 2           | 0.0001 | -         |
| CUB200      | 0.0001          | -         | 1        | 0.5        | 4           | 0.001  | ✓         |
| Places365   | 0.0001          | -         | 1        | 2          | 2           | 0.001  | ✓         |
| CIFAR100    | 0.001           | ✓         | 1        | 1          | 4           | 0.0001 | -         |

Table 6. Sample of 30 concepts from the two concept sets used in our experiments. Roman Law concepts extracted from the content of the relevant Wikipedia page, and a set of randomly generated strings.

| Roman Law Concepts |            | Random Words  |               |
|--------------------|------------|---------------|---------------|
| Jurisprudential    | historians | gsankm        | sjklrveogjc   |
| administrative     | impede     | ehxrpq        | pdhbhidbnvjig |
| bureaucratization  | individual | swsbkzguqjil  | cygmao        |
| centuries          | iudicum    | odbhhqr       | foqmegkdep    |
| civil              | knowledge  | rwkkmbezusn   | fdqumo        |
| delegation         | latitude   | qkfns         | hkeeyhw       |
| descendants        | laws       | ntqwbpkwald   | kzhqpxhr      |
| disappear          | legal      | jnplmlek      | sgwftaole     |
| ecclesiastical     | magistrate | qtxvhsjlex    | esdyegcbw     |
| emperors           | mancipatio | qfggdblkkli   | zghijqngltcoo |
| enjoy              | military   | nckusvorw     | tihgu         |
| faithful           | more       | znnufioys     | dmemmjvd      |
| features           | nations    | kvqpasqqkgt   | ghhtwbxlmphi  |
| formularies        | normal     | ydatcmpeqsmnf | ulecplindw    |
| grants             | obvious    | zebwdzhjfx    | cynrhdm       |

concept sets are used throughout all experiments presented in [Fig. 2](#), [Fig. 3](#), [Fig. 5](#) and in [Tab. 1](#). The Roman Law concepts were extracted from the corresponding Wikipedia page, while the random strings were sampled uniformly at random, as described in [Sec. 5](#).

#### A.4. Concept Activation Distributions of Different VLMs

We compute concept activations on the ImageNet100 dataset using both the GPT-generated concept set as the relevant concepts and a set of random strings as the irrelevant concepts. The evaluated VLMs include CLIP, SigLIP, SAIL, and FLAIR. For each model, we report the distribution of the top-100 concept activations per image in [Fig. 8](#). Across the four VLMs, the activation distributions differ substantially in both scale and spread. SAIL exhibits the

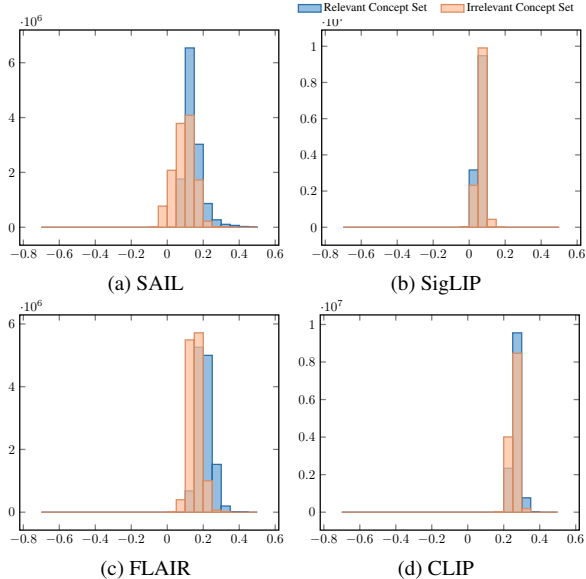

Figure 8. Histogram of concept activations computed with different VLMs for the relevant and irrelevant concept sets on ImageNet100, highlighting differences in activation distributions across models when evaluated on meaningful versus random concepts.

Table 7. Robustness of the goodness of concepts metric to varying cutoff values on ImageNet100.

| Concept Set | Task Agnostic ↓ |              |              |
|-------------|-----------------|--------------|--------------|
|             | Top-10          | Top-100      | Top-250      |
| Relevant    | <b>1.751</b>    | <b>3.660</b> | <b>4.521</b> |
| Irrelevant  | 2.254           | 4.504        | 5.376        |
| Random      | 2.284           | 4.565        | 5.465        |

widest distribution, with both relevant and irrelevant concepts producing high activations, whereas SigLIP and CLIP show much more compact distributions. Overall, these results highlight the differences in how VLMs encode concepts.

### A.5. Goodness of Concepts with Varying Cutoff Values

We use a cutoff of 100 concepts that can be consistently applied to both ImageNet100 and CUB200, whose concept sets contain 4,751 and 370 concepts, respectively. Importantly, the goodness-of-concepts metric is largely insensitive to the specific choice of cutoff: relevant concept sets consistently exhibit lower entropy, whereas irrelevant concept sets yield higher entropy across different cutoff values. In Tab. 7, we provide a quantitative evaluation of goodness of concepts on ImageNet100 with varying cutoff values. We observe that varying cutoff values yields robust behavior.

Table 8. Task-agnostic goodness of concepts: suitability of different concept sets for different datasets. Relevant concepts are GPT-generated in ImageNet100 and Places365 and ground-truth attributes in CUB200. The irrelevant concept set consists of Roman Law terminology. Random strings denote non-word concepts. Lower entropy indicates better alignment.

| ImageNet100  |       |       |       |        |
|--------------|-------|-------|-------|--------|
| Concept Set  | CLIP  | SAIL  | FLAIR | SigLIP |
| Relevant     | 4.479 | 3.660 | 4.545 | 4.494  |
| Irrelevant   | 4.480 | 4.504 | 4.511 | 4.534  |
| Random words | 4.555 | 4.565 | 4.565 | 4.522  |
| CUB200       |       |       |       |        |
| Concept Set  | CLIP  | SAIL  | FLAIR | SigLIP |
| Relevant     | 4.456 | 4.305 | 4.459 | 4.463  |
| Irrelevant   | 4.422 | 4.491 | 4.533 | 4.534  |
| Random words | 4.542 | 4.553 | 4.577 | 4.491  |
| Places365    |       |       |       |        |
| Concept Set  | CLIP  | SAIL  | FLAIR | SigLIP |
| Relevant     | 4.482 | 3.077 | 4.534 | 4.512  |
| Irrelevant   | 4.472 | 4.505 | 4.531 | 4.539  |
| Random words | 4.557 | 4.566 | 4.563 | 4.600  |

### A.6. Goodness of Concepts Results with Various VLMs

The goodness of concept metric is calculated across ImageNet100, CUB200 and Places365 datasets using several VLMs. Results are reported in two settings: task-agnostic in Tab. 8 and task-specific in Tab. 9.

Across all datasets and models, the metric consistently demonstrate a clear separation between relevant and irrelevant concepts. Relevant concepts achieve the lowest entropy, indicating stronger alignment between the concepts and the images in both settings.

This trend is especially pronounced for SAIL, which also exhibits a distinctive concept activation distribution in Fig. 8. SAIL yields markedly lower entropy values for relevant concepts in both ImageNet100 and Places365.

Overall, these results confirm that the goodness of concepts metric reliably captures concept set suitability across a range of VLMs and diverse domains.

### A.7. Refining concept set via Goodness of Concepts

In Fig. 9, we demonstrate that the goodness of concepts metric enables concept set refinement. We create a mixed concept set with 75% CUB attributes and 25% random words. The figure above shows entropy reduction over removal iterations. The red line represents random concept

Table 9. Task-specific goodness of concepts: suitability of different concept sets for different datasets. Relevant concepts are GPT-generated in ImageNet100 and Places365 and ground-truth attributes in CUB200. The irrelevant concept set consists of Roman Law terminology. Random strings denote non-word concepts. Lower entropy indicates better alignment.

| ImageNet100  |       |       |       |        |
|--------------|-------|-------|-------|--------|
| Concept Set  | CLIP  | SAIL  | FLAIR | SigLIP |
| Relevant     | 4.517 | 3.738 | 4.578 | 4.522  |
| Irrelevant   | 4.529 | 4.545 | 4.572 | 4.559  |
| Random words | 4.576 | 4.579 | 4.589 | 4.556  |

  

| CUB200       |       |       |       |        |
|--------------|-------|-------|-------|--------|
| Concept Set  | CLIP  | SAIL  | FLAIR | SigLIP |
| Relevant     | 4.456 | 4.383 | 4.459 | 4.463  |
| Irrelevant   | 4.422 | 4.526 | 4.533 | 4.534  |
| Random words | 4.542 | 4.565 | 4.577 | 4.491  |

  

| Places365    |       |       |       |        |
|--------------|-------|-------|-------|--------|
| Concept Set  | CLIP  | SAIL  | FLAIR | SigLIP |
| Relevant     | 4.549 | 2.889 | 4.579 | 4.512  |
| Irrelevant   | 4.551 | 4.547 | 4.583 | 4.540  |
| Random words | 4.591 | 4.578 | 4.592 | 4.600  |

removal (averaged over 10 trials), while the blue line shows entropy-guided removal (selecting concepts whose removal minimizes entropy). Entropy-guided removal achieves consistently lower entropy, indicating more concentrated and meaningful concept activations. Crucially, entropy-guided removal preferentially eliminates random words: 17.9% of removed concepts came from the random-word subset, compared to only 13.7% for random removal. This demonstrates that goodness of concepts effectively identifies and removes irrelevant concepts, validating its utility for concept set refinement.

### A.8. Ablations

To inspect the disentangled effects of non-linearity and distillation, we conduct an ablation experiment. As shown in Tab. 10, linearity is the primary factor affecting performance. However, non-linearity is required for a trustworthy CBM (cf. Fig. 5). To reconcile this trade-off, we improve the accuracy of non-linear models through knowledge distillation, which consistently recovers a substantial portion of the performance gap.

### A.9. Extended Interpretability Results on Different Datasets

The extended version of Fig. 7 is provided in the Fig. 10 where we report the top-5 activated concepts for random

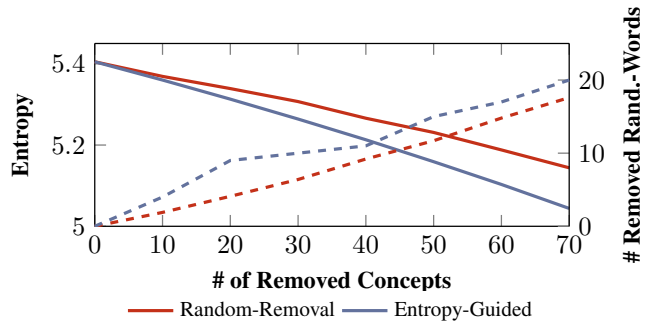

Figure 9. Concept set refinement. Entropy-guided removal (blue) outperforms random removal (red, averaged over 10 trials) and preferentially eliminates random concepts, demonstrating the effectiveness of the goodness-of-concepts metric. Solid lines correspond to the entropy (left y-axis), while dashed lines correspond to the number of removed random words (right y-axis).

Table 10. Ablation study disentangling the effects of linearity and knowledge distillation.

| Configuration             | Accuracy (%) |
|---------------------------|--------------|
| Linear                    | 87.96        |
| Linear + Distillation     | 90.37        |
| Non-linear                | 82.27        |
| Non-linear + Distillation | 85.56        |

classes. The best performing vision backbone and VLM combinations for each dataset are as follows: Perception Encoder + SigLIP for ImageNet100, Perception Encoder + CLIP for all remaining datasets.

|             |                                                                                                                             |                                                                                                                                                                                                                                    |                                                                                                                      |                                                                                                                                                                                                                                                    |                                                                                                                     |                                                                                                                                                                                                                            |                                                                                                                         |                                                                                                                                                                                                                                          |
|-------------|-----------------------------------------------------------------------------------------------------------------------------|------------------------------------------------------------------------------------------------------------------------------------------------------------------------------------------------------------------------------------|----------------------------------------------------------------------------------------------------------------------|----------------------------------------------------------------------------------------------------------------------------------------------------------------------------------------------------------------------------------------------------|---------------------------------------------------------------------------------------------------------------------|----------------------------------------------------------------------------------------------------------------------------------------------------------------------------------------------------------------------------|-------------------------------------------------------------------------------------------------------------------------|------------------------------------------------------------------------------------------------------------------------------------------------------------------------------------------------------------------------------------------|
| ImageNet100 | <p>Class Name</p> <p>Robin</p>             | <p>Top-5 Concepts</p> <ol style="list-style-type: none"> <li>1. a bright orange breast</li> <li>2. a rufous back and wings</li> <li>3. a reddish-brown breast</li> <li>4. a small songbird</li> <li>5. finch</li> </ol>            | <p>Class Name</p> <p>Carbonara</p>  | <p>Top-5 Concepts</p> <ol style="list-style-type: none"> <li>1. pasta</li> <li>2. bacon or pancetta</li> <li>3. Italian dish</li> <li>4. noodles</li> <li>5. a creamy sauce</li> </ol>                                                             | <p>Class Name</p> <p>Pedestal</p>  | <p>Top-5 Concepts</p> <ol style="list-style-type: none"> <li>1. a statue</li> <li>2. a tall, upright stature</li> <li>3. a small stature</li> <li>4. columns or towers</li> <li>5. marble or stone construction</li> </ol> | <p>Class Name</p> <p>Slide Rule</p>  | <p>Top-5 Concepts</p> <ol style="list-style-type: none"> <li>1. rulers</li> <li>2. a foot measuring device</li> <li>3. a ruler</li> <li>4. a height chart</li> <li>5. a train schedule</li> </ol>                                        |
|             | <p>CUB200</p> <p>Bay breasted Warbler</p>  | <p>Top-5 Concepts</p> <ol style="list-style-type: none"> <li>1. a long, tapered tail</li> <li>2. a rust-colored cap and nape</li> <li>3. a pinkish breast</li> <li>4. a buffy breast</li> <li>5. a red spot on the beak</li> </ol> | <p>Cactus Wren</p>                  | <p>Top-5 Concepts</p> <ol style="list-style-type: none"> <li>1. long hind legs for jumping</li> <li>2. a white stripe on the wings</li> <li>3. mottled grey and white plumage</li> <li>4. dark wingtips</li> <li>5. a large, green head</li> </ol> | <p>Purple Finch</p>                | <p>Top-5 Concepts</p> <ol style="list-style-type: none"> <li>1. a red head</li> <li>2. a rosy breast</li> <li>3. a pinkish breast</li> <li>4. a purple-red head and breast</li> <li>5. a white eye-ring</li> </ol>         | <p>Blue winged Warbler</p>           | <p>Top-5 Concepts</p> <ol style="list-style-type: none"> <li>1. a yellow head</li> <li>2. a yellow body</li> <li>3. a yellow head and throat</li> <li>4. a yellow cap on the head</li> <li>5. a brown back and wings</li> </ol>          |
|             | <p>CIFAR100</p> <p>Road</p>              | <p>Top-5 Concepts</p> <ol style="list-style-type: none"> <li>1. a long, straight path</li> <li>2. a driveway</li> <li>3. way</li> <li>4. a path</li> <li>5. markings for lanes</li> </ol>                                          | <p>Cloud</p>                      | <p>Top-5 Concepts</p> <ol style="list-style-type: none"> <li>1. the sky</li> <li>2. floating in the sky</li> <li>3. sky</li> <li>4. lots of smoke</li> <li>5. weather</li> </ol>                                                                   | <p>Telephone</p>                 | <p>Top-5 Concepts</p> <ol style="list-style-type: none"> <li>1. a phone</li> <li>2. communication device</li> <li>3. a keypad on one side</li> <li>4. a phone book</li> <li>5. lateral symmetry</li> </ol>                 | <p>Sweet Pepper</p>                | <p>Top-5 Concepts</p> <ol style="list-style-type: none"> <li>1. vegetable</li> <li>2. a kitchen</li> <li>3. a compost bin</li> <li>4. a red, green, or yellow color</li> <li>5. a greenhouse</li> </ol>                                  |
|             | <p>Places365</p> <p>Ocean</p>            | <p>Top-5 Concepts</p> <ol style="list-style-type: none"> <li>1. the sea</li> <li>2. clear blue waters</li> <li>3. seaweed</li> <li>4. a surfboard</li> <li>5. a boat ramp</li> </ol>                                               | <p>Auto Showroom</p>              | <p>Top-5 Concepts</p> <ol style="list-style-type: none"> <li>1. car models</li> <li>2. cars parked in the lot</li> <li>3. vertical or nearly vertical</li> <li>4. a showroom floor</li> <li>5. a glossy finish</li> </ol>                          | <p>Lake, natural</p>             | <p>Top-5 Concepts</p> <ol style="list-style-type: none"> <li>1. a body of water</li> <li>2. a reservoir</li> <li>3. a lake or river</li> <li>4. a wetland</li> <li>5. a koi pond</li> </ol>                                | <p>Palace</p>                      | <p>Top-5 Concepts</p> <ol style="list-style-type: none"> <li>1. a royal residence</li> <li>2. grand, ornate architecture</li> <li>3. often has towers or turrets</li> <li>4. guards</li> <li>5. a garden on top of a building</li> </ol> |

Figure 10. Illustration of the Top-5 concepts, ranked by their contribution to the final prediction for randomly selected classes, along with representative images from ImageNet100, CIFAR100, CUB200, and Places365, highlighting model interpretability across diverse domains.
